# Supplementary material
Source: PubMed Central journal article supplement (PMC4445650)

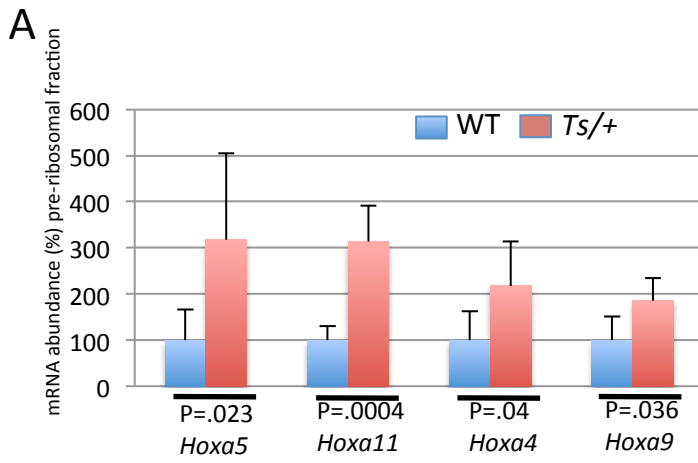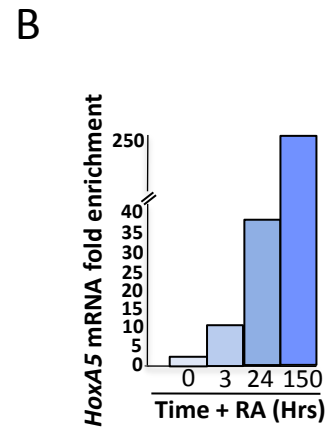

Supplement: NIHMS686819-supplement-Figure_S6.pdf [file NIHMS686819-supplement-Figure_S6.pdf]

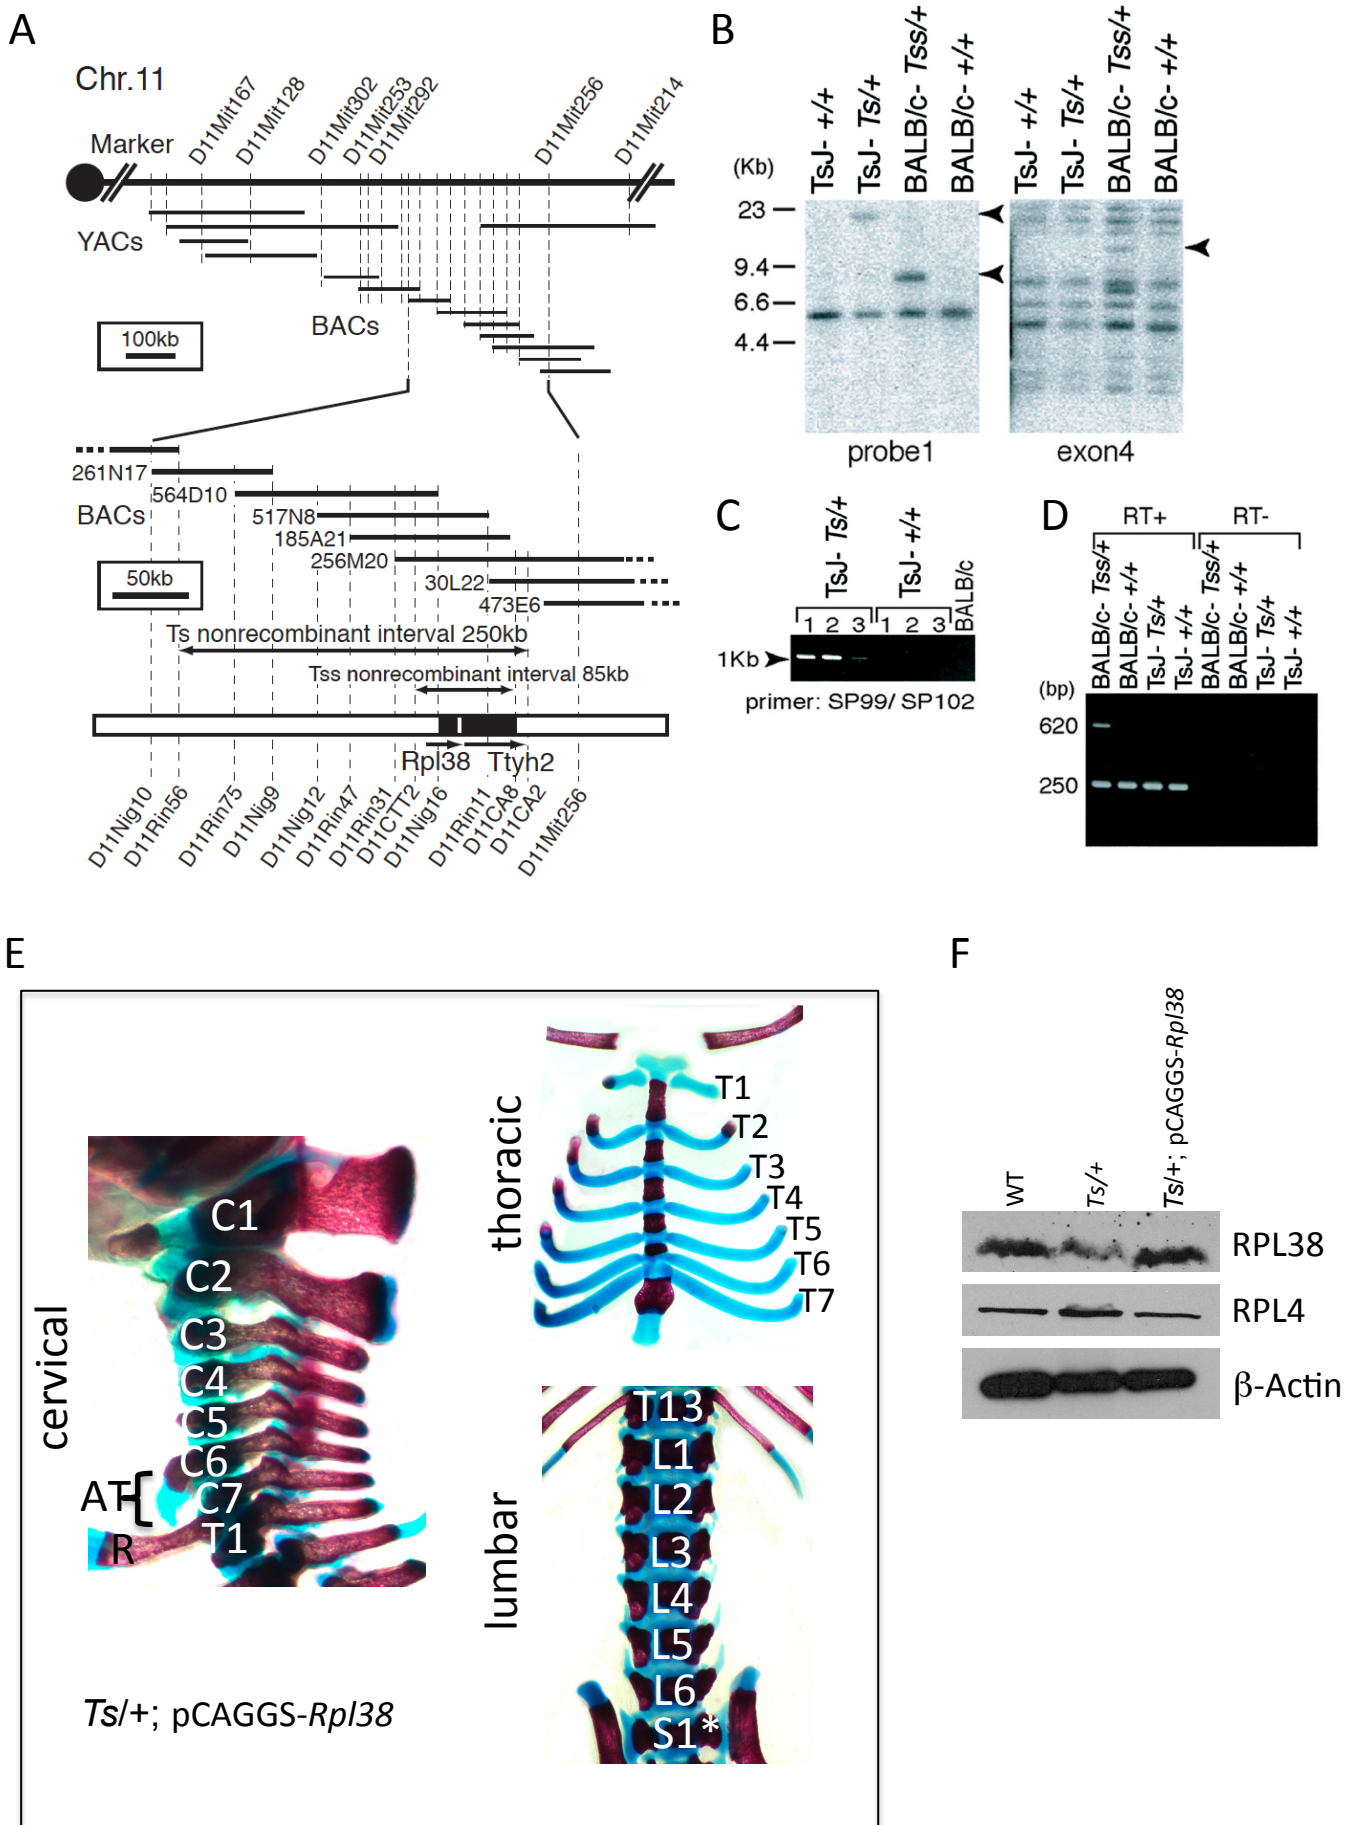

Supplement: NIHMS686819-supplement-Supplemental_Figure_1.pdf [file NIHMS686819-supplement-Supplemental_Figure_1.pdf]

A

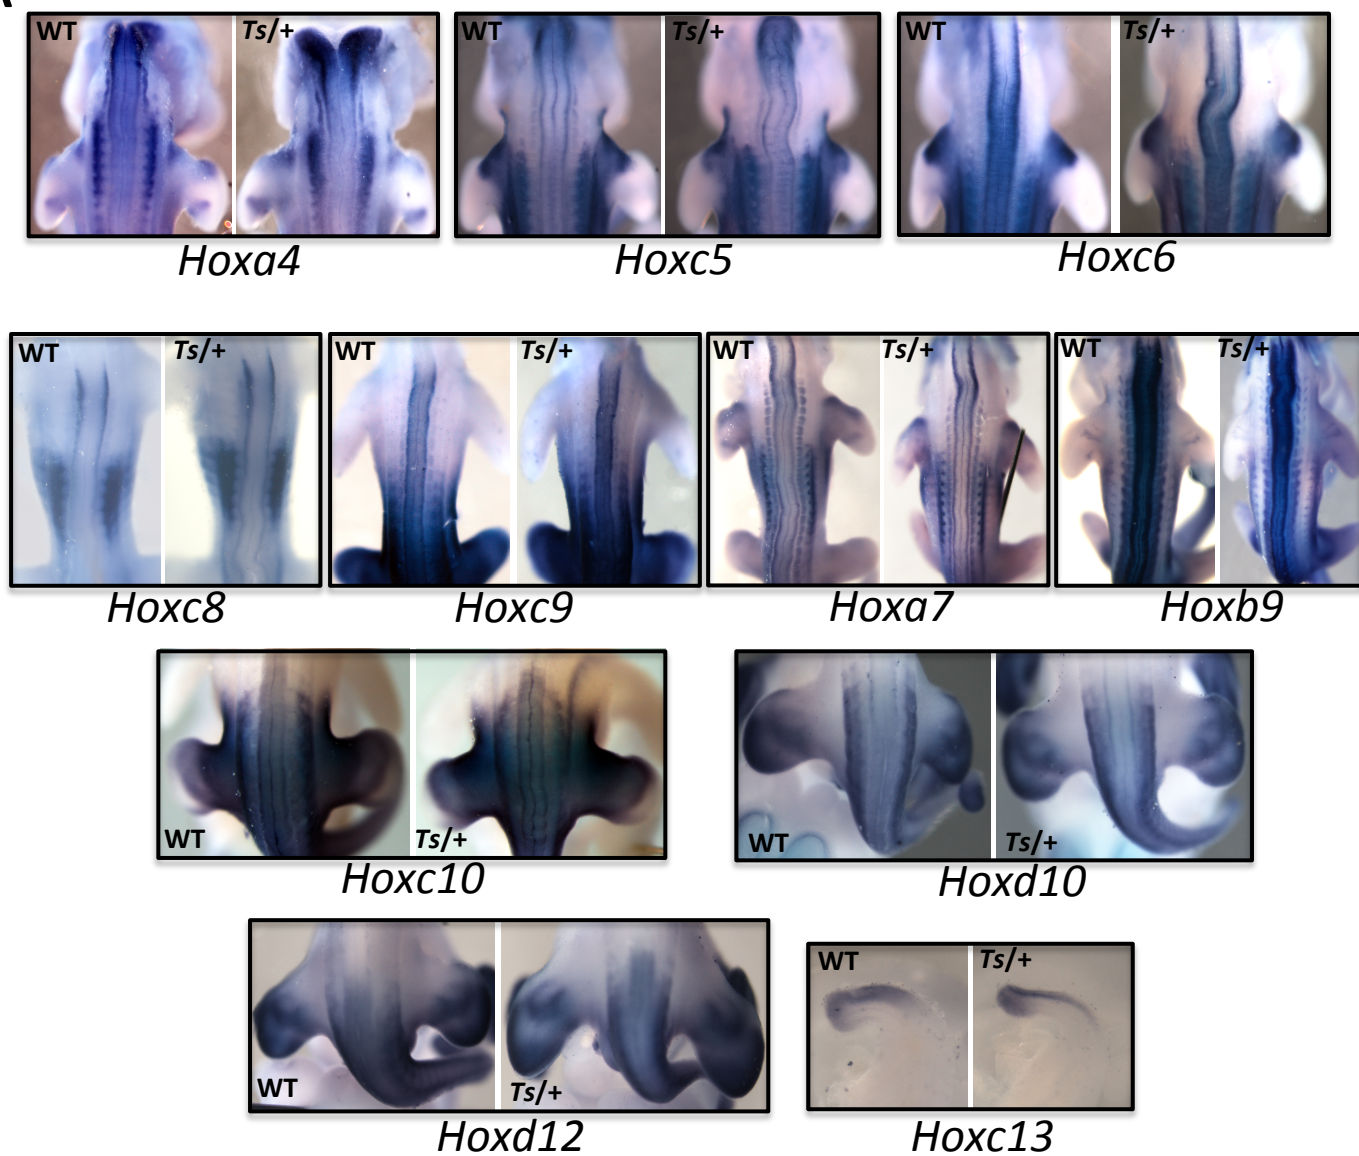

B

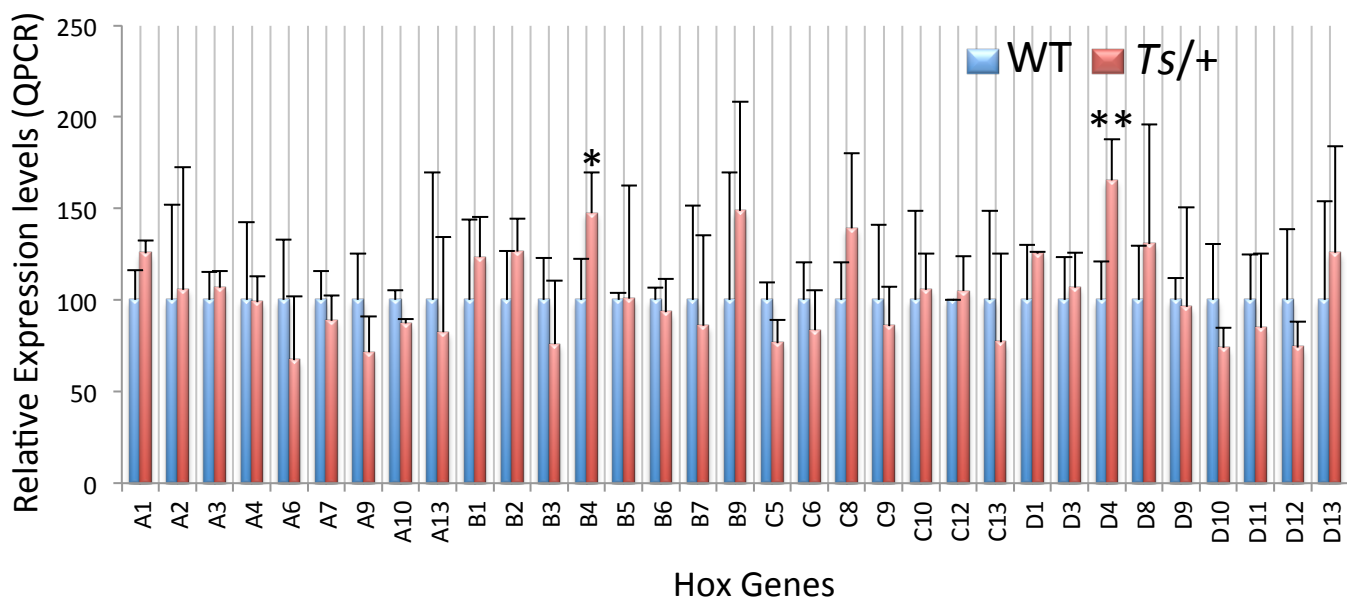

Supplement: NIHMS686819-supplement-Supplemental_Figure_2.pdf [file NIHMS686819-supplement-Supplemental_Figure_2.pdf]

**Figure S3**

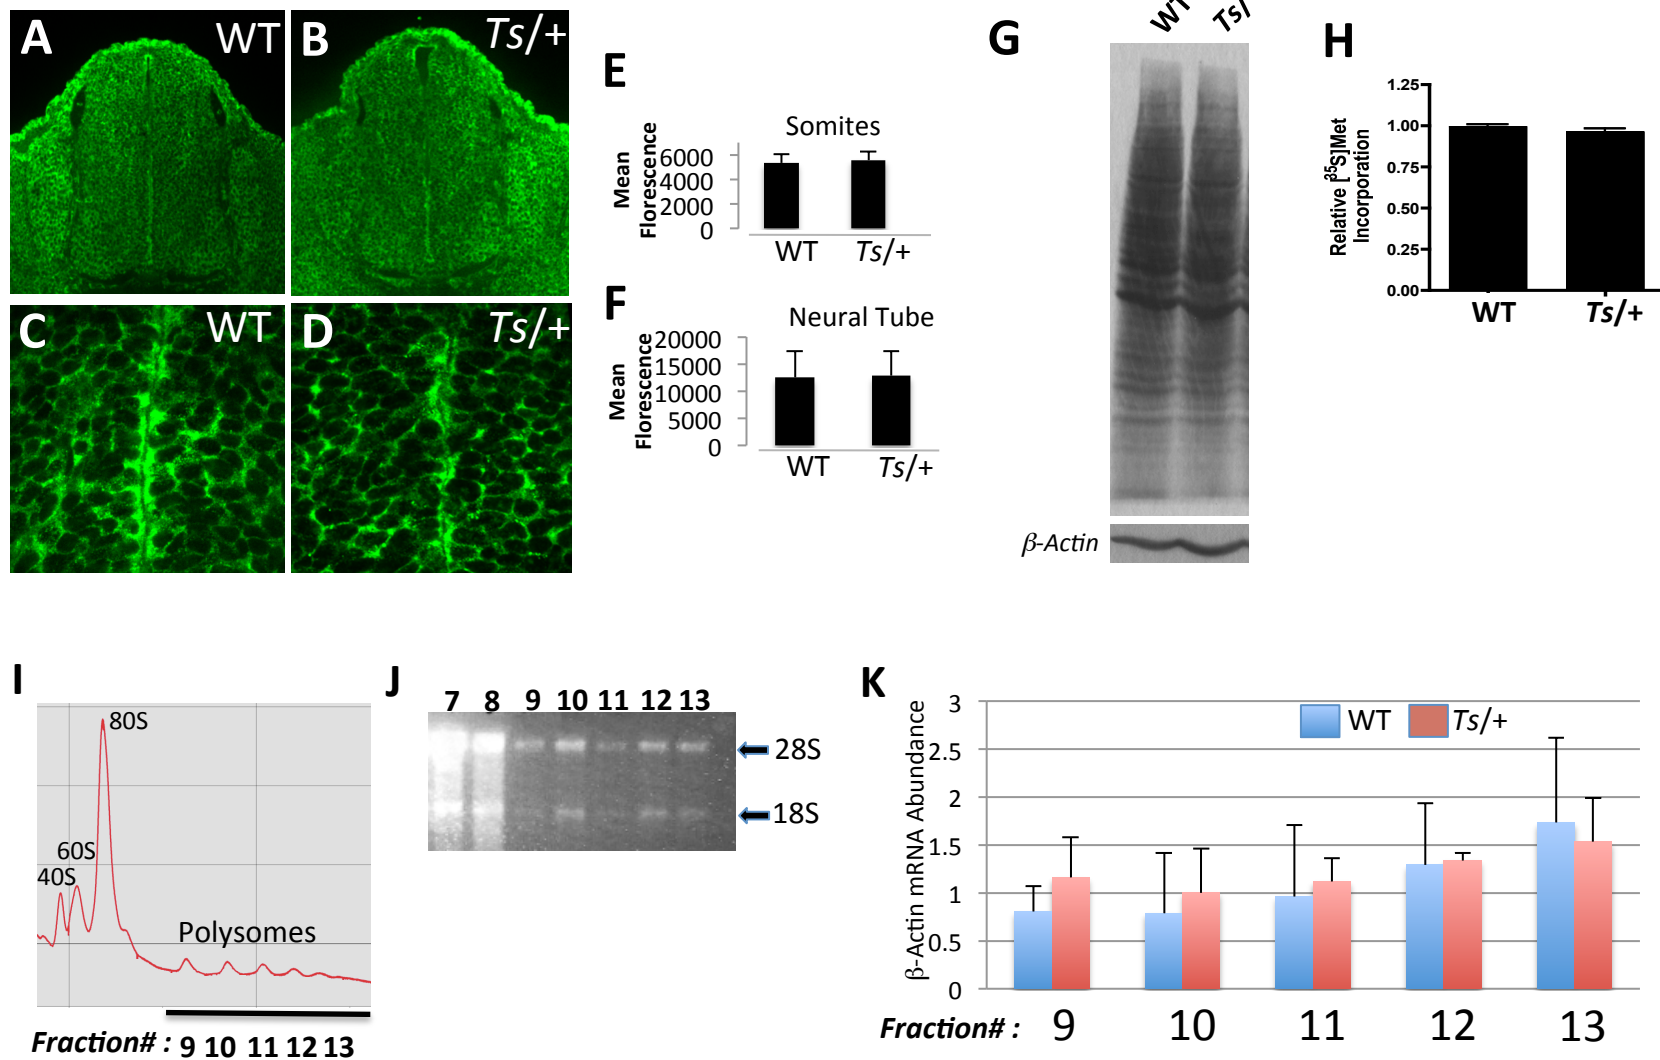

Supplement: NIHMS686819-supplement-Supplemental_Figure_3.pdf [file NIHMS686819-supplement-Supplemental_Figure_3.pdf]

Figure S5

A

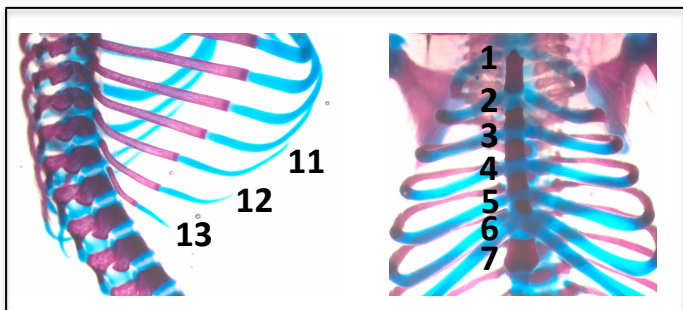

WT

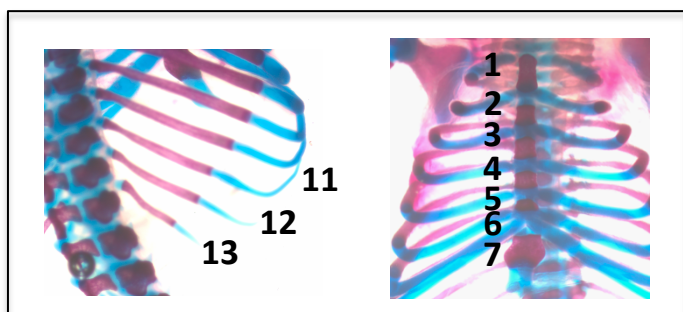

P53<sup>+/</sup>

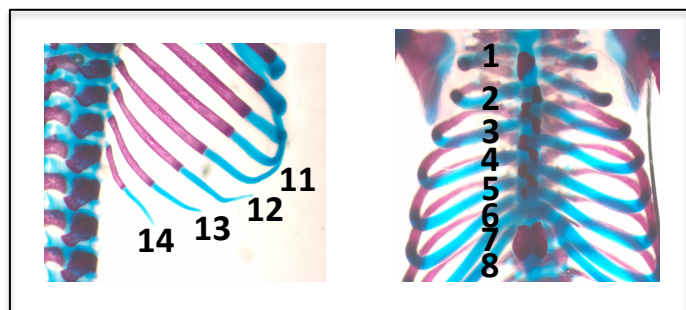

P53<sup>+/-</sup>; Ts/+

B

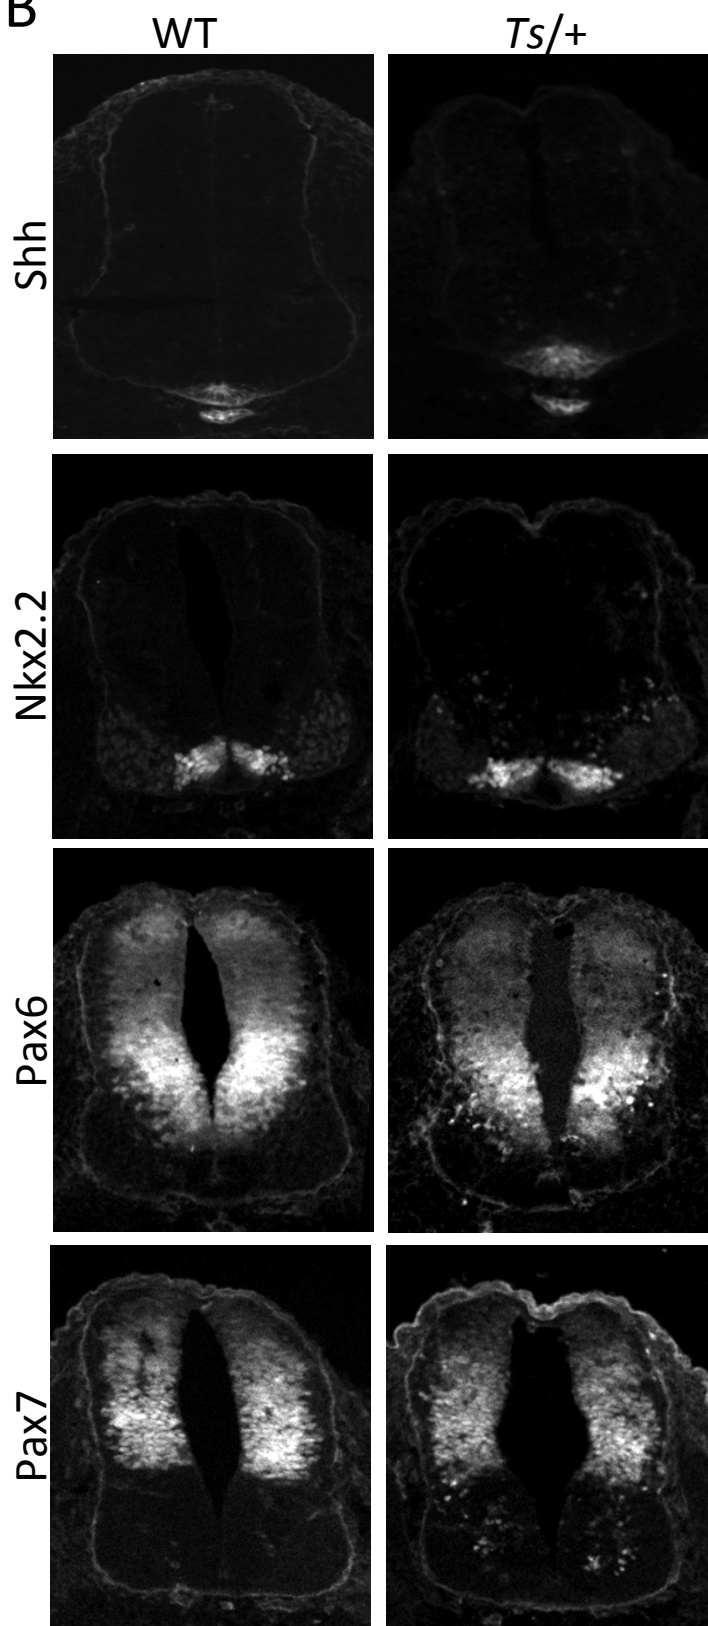

Supplement: NIHMS686819-supplement-Supplemental_Figure_5.pdf [file NIHMS686819-supplement-Supplemental_Figure_5.pdf]

A

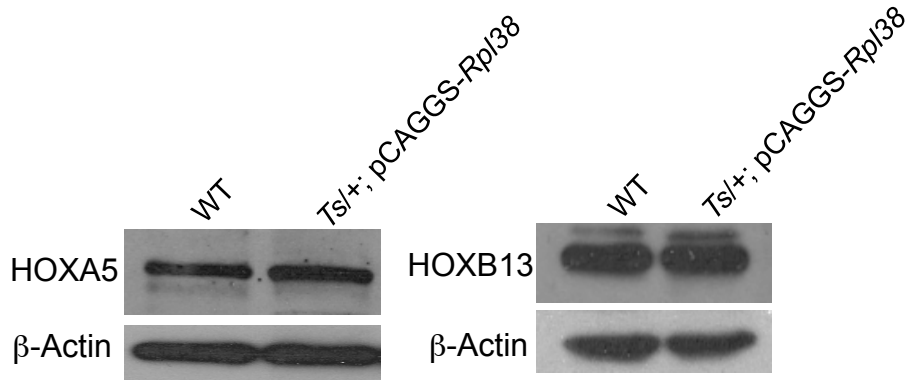

B

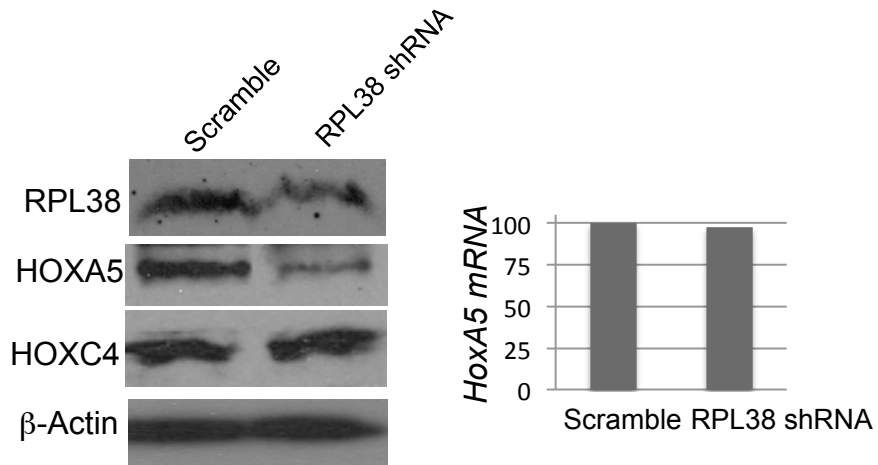

C

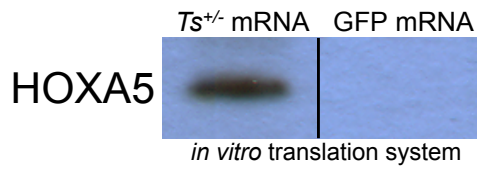

D

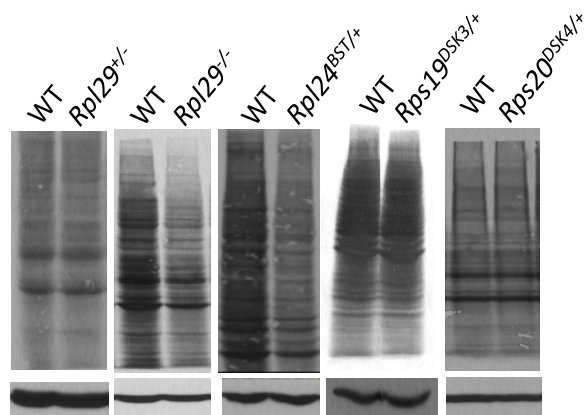

Supplement: NIHMS686819-supplement-Supplemental_Figure_S4.pdf [file NIHMS686819-supplement-Supplemental_Figure_S4.pdf]
